# Supplementary material for: Endothelial angiopoietin-2 overexpression in explanted livers identifies subjects at higher risk of recurrence of hepatocellular carcinoma after liver transplantation
Source: PubMed Central journal article supplement (PMC9493368; doi:10.3389/fonc.2022.960808), 2022-09-08
Supplement: DataSheet_1.pdf [file DataSheet_1.pdf]

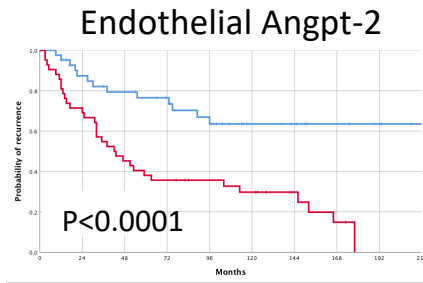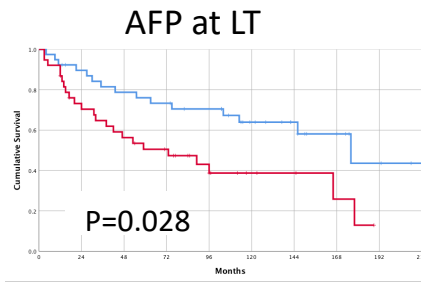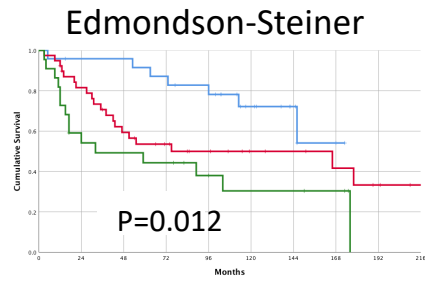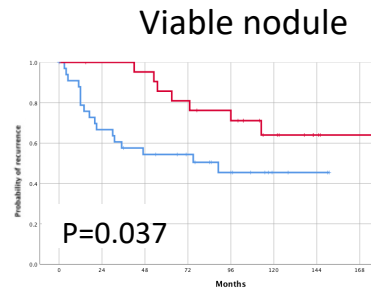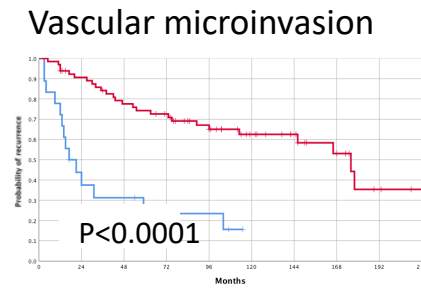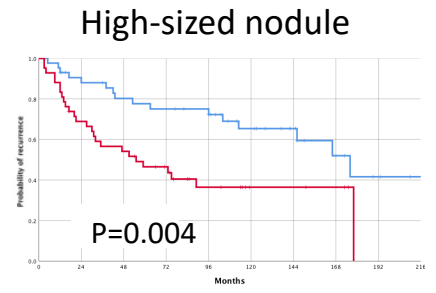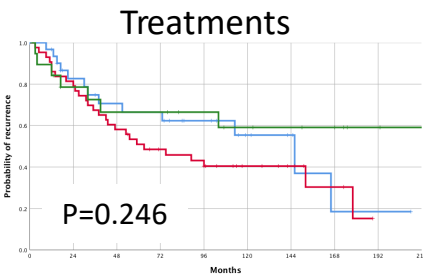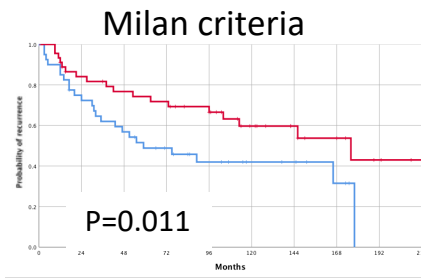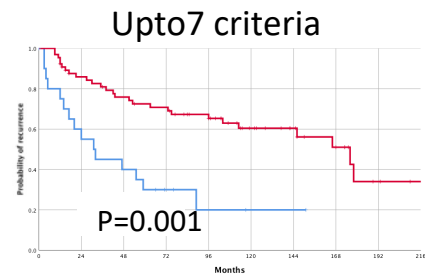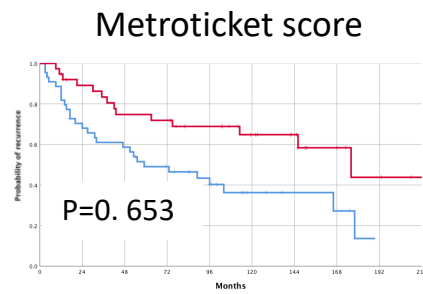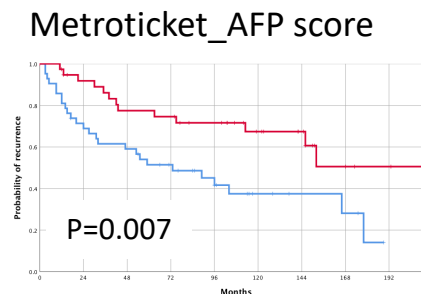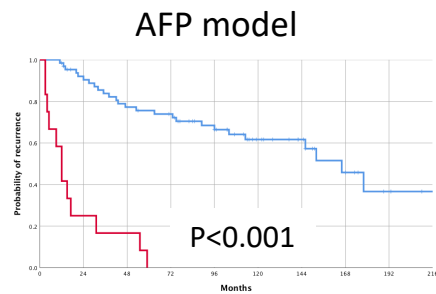

**Probability of HCC recurrence after LT.** Probability of HCC recurrence after liver transplantation was evaluated by Kaplan-Meier method. A. A clear-cut distinction was present between patients, who had higher median angiopoietin-2 levels, and those who had lower median levels. B-D. Subjects who at transplant had microvascular invasion in explanted liver or Edmondson-Steiner grade G3-G4 or higher AFP levels had high recurrence rate but absence of microvascular invasion, Edmondson-Steiner grade G0-G2 or lower AFP levels did not relate with recurrence -free outcome. E-H. Predictive power for the most used clinical scores was low. Among the scores, AFP model was the one that better stratified recurrence risk.
