# Supplementary material for: Endothelial angiopoietin-2 overexpression in explanted livers identifies subjects at higher risk of recurrence of hepatocellular carcinoma after liver transplantation
Source: PubMed Central journal article supplement (PMC9493368; doi:10.3389/fonc.2022.960808), 2022-09-08
Supplement: DataSheet_2.pdf [file DataSheet_2.pdf]

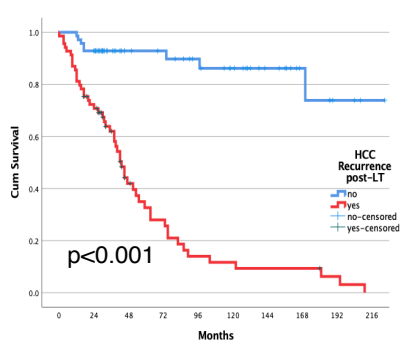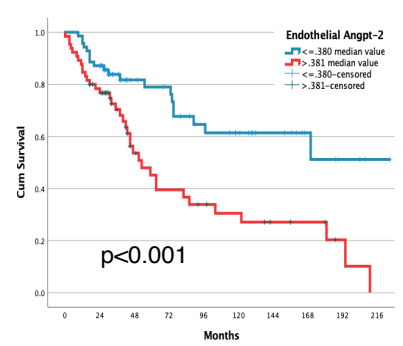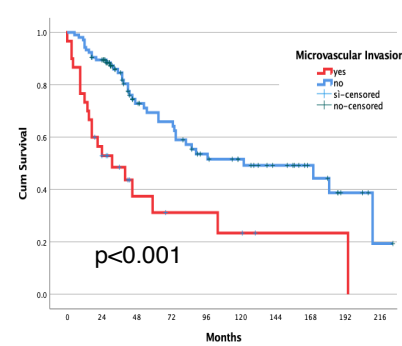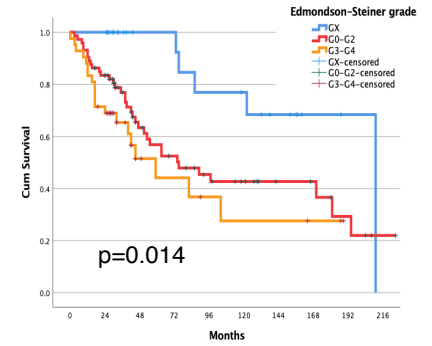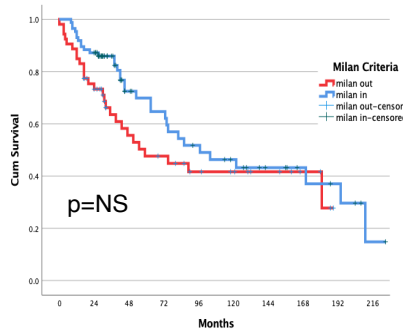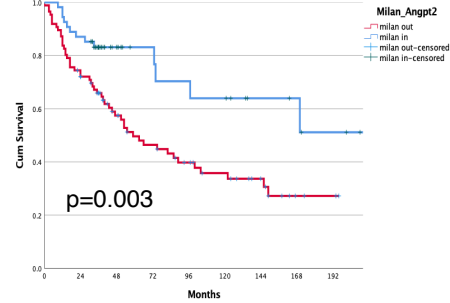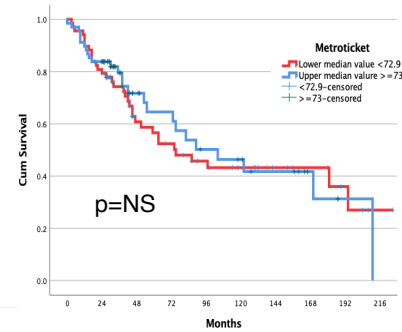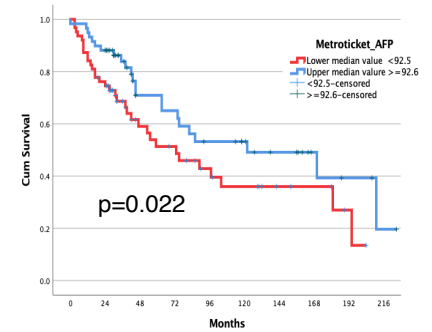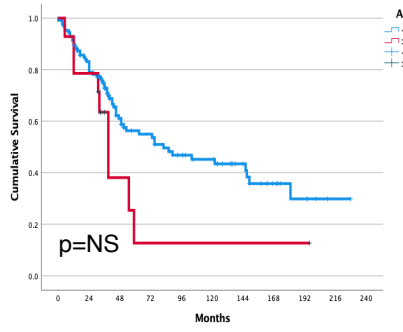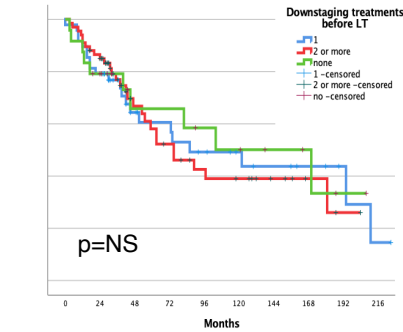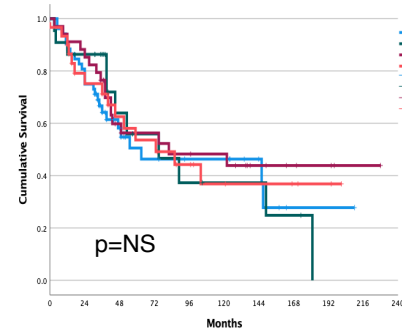

Probability of HCC survival after LT. Probability of HCC survival after liver transplantation was evaluated by Kaplan-Meier method
